# Supplementary material for: A systematic review of the burden of hypertension, access to services and patient views of hypertension in humanitarian crisis settings
Source: PubMed Central journal article supplement (PMC7654140; doi:10.1136/bmjgh-2020-002440), 2020-11-09
Supplement: bmjgh-2020-002440supp001.pdf [file bmjgh-2020-002440supp001.pdf]

19 Aug 19 - 12:01

**HDAS** Export  
**Strategy** prim prev htn

[See full search strategy](#)**Strategy** 699745/67

| #  | Database | Search term                                                                                                                                                                                                                                                                                                                                                                                                                                                                                                                                                                                                                                                                                                                                                                                                                  | Results |
|----|----------|------------------------------------------------------------------------------------------------------------------------------------------------------------------------------------------------------------------------------------------------------------------------------------------------------------------------------------------------------------------------------------------------------------------------------------------------------------------------------------------------------------------------------------------------------------------------------------------------------------------------------------------------------------------------------------------------------------------------------------------------------------------------------------------------------------------------------|---------|
| 67 | Medline  | (exp DISASTERS/ OR (Mass Casualty Event).ti,ab OR exp REFUGEES/ OR exp "WARFARE AND ARMED CONFLICTS"/ OR exp "NATURAL DISASTERS"/ OR exp AVALANCHES/ OR exp EARTHQUAKES/ OR exp FLOODS/ OR exp LANDSLIDES/ OR exp "TIDAL WAVES"/ OR exp TSUNAMIS/ OR exp "CYCLONIC STORMS"/ OR exp DROUGHTS/ OR exp STARVATION/ OR (humanitarian ADJ2 crisis).ti,ab OR (humanitarian ADJ2 crises).ti,ab OR (humanitarian ADJ2 emergenc*).ti,ab OR (humanitarian ADJ2 relief).ti,ab OR (humanitarian ADJ2 response).ti,ab OR (humanitarian ADJ2 agenc*).ti,ab OR (refugee*).ti,ab OR (asylum seeker*).ti,ab OR (evacuee*).ti,ab OR (evacuated*).ti,ab OR (war OR wars OR warfare).ti,ab OR (avalanche*).ti,ab OR (earthquake*).ti,ab OR (flood*).ti,ab OR (landslide*).ti,ab OR (tidal wave*).ti,ab OR (tsunami*).ti,ab OR (cyclon*).ti,ab OR | 9444    |

(hurricane\*).ti,ab OR  
(typhoon\*).ti,ab OR  
(drought\*).ti,ab OR  
(famine\*).ti,ab OR  
(starvation\*).ti,ab OR (displace\*  
ADJ2 force\*).ti,ab OR  
(displace\* ADJ2  
population\*).ti,ab OR (displace\*  
ADJ2 human).ti,ab OR  
(displace\* ADJ2 internal\*).ti,ab  
OR (displace\* ADJ2  
person\*).ti,ab OR (displace\*  
ADJ2 people\*).ti,ab OR  
(conflict\* ADJ2 armed).ti,ab OR  
(conflict\* ADJ2 zone\*).ti,ab OR  
(conflict affected ADJ3  
population\*).ti,ab OR (conflict  
affected ADJ3 person\*).ti,ab  
OR (conflict affected ADJ3  
people\*).ti,ab OR (conflict  
affected ADJ3 communit\*).ti,ab  
OR (disaster\* ADJ3  
natural).ti,ab OR (disaster\*  
ADJ3 victim\*).ti,ab OR  
(disaster\* ADJ3 plan\*).ti,ab OR  
(disaster\* ADJ3 relief\*).ti,ab OR  
(persecution).ti,ab) AND (exp  
"ESSENTIAL  
HYPERTENSION"/ OR exp  
HYPERTENSION/ OR exp  
"NONCOMMUNICABLE  
DISEASES"/ OR (high blood  
pressure).ti,ab OR (HBP).ti,ab  
OR (HTN).ti,ab OR (NCD).ti,ab  
OR (non\*communicable  
disease\*).ti,ab OR (chronic  
diseas\*).ti,ab OR (chronic  
condition\*).ti,ab OR (long term  
condition\*).ti,ab OR  
(hyperten\*).ti,ab OR  
(cardiovascular disease).ti,ab  
OR (heart disease).ti,ab OR  
exp "BLOOD PRESSURE"/ OR  
(blood pressure).ti,ab OR exp  
"CHRONIC DISEASE"/)

(47 AND 66) [DT TO 1999] [View Results \(3,018\)](#)

(47 AND 66) [DT 2000-2010] [View Results \(2,666\)](#)

(47 AND 66) [DT FROM 2011] [Viewing \(3,760\)](#)

19 Aug 19 - 12:32

## HDAS Export

### Strategy htn embase

[See full search strategy](#)

### Strategy 700592/177

| #   | Database | Search term                                                                                                                                                                                                                                                                                                                                                                                                                                                                                                                                                                                                                                                                                                                                                                                                                                                                                       | Results |
|-----|----------|---------------------------------------------------------------------------------------------------------------------------------------------------------------------------------------------------------------------------------------------------------------------------------------------------------------------------------------------------------------------------------------------------------------------------------------------------------------------------------------------------------------------------------------------------------------------------------------------------------------------------------------------------------------------------------------------------------------------------------------------------------------------------------------------------------------------------------------------------------------------------------------------------|---------|
| 177 | EMBASE   | ((humanitarian ADJ2 crisis).ti,ab OR (humanitarian ADJ2 crises).ti,ab OR (humanitarian ADJ2 emergenc*).ti,ab OR (humanitarian ADJ2 relief).ti,ab OR (humanitarian ADJ2 response).ti,ab OR (humanitarian ADJ2 agenc*).ti,ab OR (refugee*).ti,ab OR (asylum seeker*).ti,ab OR (evacuee*).ti,ab OR (evacuated*).ti,ab OR (war OR wars OR warfare).ti,ab OR (avalanche*).ti,ab OR (earthquake*).ti,ab OR (flood*).ti,ab OR (landslide*).ti,ab OR (tidal wave*).ti,ab OR (tsunami*).ti,ab OR (cyclon*).ti,ab OR (hurricane*).ti,ab OR (typhoon*).ti,ab OR (drought*).ti,ab OR (famine*).ti,ab OR (starvation*).ti,ab OR (displace* ADJ2 force*).ti,ab OR (displace* ADJ2 population*).ti,ab OR (displace* ADJ2 human).ti,ab OR (displace* ADJ2 internal*).ti,ab OR (displace* ADJ2 person*).ti,ab OR (displace* ADJ2 people*).ti,ab OR (conflict* ADJ2 armed).ti,ab OR (conflict* ADJ2 zone*).ti,ab OR | 5542    |

(conflict affected ADJ3  
population\*).ti,ab OR (conflict  
affected ADJ3 person\*).ti,ab  
OR (conflict affected ADJ3  
people\*).ti,ab OR (conflict  
affected ADJ3 communit\*).ti,ab  
OR (disaster\* ADJ3  
natural).ti,ab OR (disaster\*  
ADJ3 victim\*).ti,ab OR  
(disaster\* ADJ3 plan\*).ti,ab OR  
(disaster\* ADJ3 relief\*).ti,ab OR  
(persecution).ti,ab OR exp  
DISASTER/ OR exp  
REFUGEE/ OR exp  
WARFARE/ OR exp WAR/ OR  
exp "NATURAL DISASTER"/  
OR exp AVALANCHE/ OR exp  
EARTHQUAKE/ OR exp  
FLOODING/ OR exp  
LANDSLIDE/ OR exp  
TSUNAMI/ OR exp  
HURRICANE/ OR exp  
DROUGHT/ OR exp  
STARVATION/ OR exp  
HUNGER/) AND (exp  
"ESSENTIAL  
HYPERTENSION"/ OR exp  
HYPERTENSION/ OR exp  
"NONCOMMUNICABLE  
DISEASES"/ OR (high blood  
pressure).ti,ab OR (HBP).ti,ab  
OR (HTN).ti,ab OR (NCD).ti,ab  
OR (non\*communicable  
disease\*).ti,ab OR (chronic  
diseas\*).ti,ab OR (chronic  
condition\*).ti,ab OR (long term  
condition\*).ti,ab OR  
(hyperten\*).ti,ab OR  
(cardiovascular disease).ti,ab  
OR (heart disease).ti,ab OR  
exp "BLOOD PRESSURE"/ OR  
(blood pressure).ti,ab OR exp  
"CHRONIC DISEASE"/)

(159 AND 176) [DT TO 1998] View Results (665)

(159 AND 176) [DT 1999-2009] View Results (1,384)

(159 AND 176) [DT FROM 2010] Viewing (3,484)

19 Aug 19 - 13:10

**HDAS** Export  
**Strategy** htn psych inf

[See full search strategy](#)

**Strategy** 702821/73

| #  | Database | Search term                                                                                                                                                                                                                                                                                                                                                                                                                                                                                                                                                                                                                                        | Results |
|----|----------|----------------------------------------------------------------------------------------------------------------------------------------------------------------------------------------------------------------------------------------------------------------------------------------------------------------------------------------------------------------------------------------------------------------------------------------------------------------------------------------------------------------------------------------------------------------------------------------------------------------------------------------------------|---------|
| 73 | PsycINFO | (exp DISASTERS/ OR exp "NATURAL DISASTERS"/ OR exp REFUGEES/ OR exp WAR/ OR exp STARVATION/ OR (humanitarian ADJ2 crisis).ti,ab OR (humanitarian ADJ2 crises).ti,ab OR (humanitarian ADJ2 emergenc*).ti,ab OR (humanitarian ADJ2 relief).ti,ab OR (humanitarian ADJ2 response).ti,ab OR (humanitarian ADJ2 agenc*).ti,ab OR (refugee*).ti,ab OR (asylum seeker*).ti,ab OR (evacuee*).ti,ab OR (evacuated*).ti,ab OR (war OR wars OR warfare).ti,ab OR (avalanche*).ti,ab OR (earthquake*).ti,ab OR (flood*).ti,ab OR (landslide*).ti,ab OR (tidal wave*).ti,ab OR (tsunami*).ti,ab OR (cyclon*).ti,ab OR (hurricane*).ti,ab OR (typhoon*).ti,ab OR | 988     |

(drought\*).ti,ab OR  
(famine\*).ti,ab OR  
(starvation\*).ti,ab OR (displace\*  
ADJ2 force\*).ti,ab OR  
(displace\* ADJ2  
population\*).ti,ab OR (displace\*  
ADJ2 human).ti,ab OR  
(displace\* ADJ2 internal\*).ti,ab  
OR (displace\* ADJ2  
person\*).ti,ab OR (displace\*  
ADJ2 people\*).ti,ab OR  
(conflict\* ADJ2 armed).ti,ab OR  
(conflict\* ADJ2 zone\*).ti,ab OR  
(conflict affected ADJ3  
population\*).ti,ab OR (conflict  
affected ADJ3 person\*).ti,ab  
OR (conflict affected ADJ3  
people\*).ti,ab OR (conflict  
affected ADJ3 communit\*).ti,ab  
OR (disaster\* ADJ3  
natural).ti,ab OR (disaster\*  
ADJ3 victim\*).ti,ab OR  
(disaster\* ADJ3 plan\*).ti,ab OR  
(disaster\* ADJ3 relief\*).ti,ab OR  
(persecution).ti,ab) AND (exp  
HYPERTENSION/ OR exp  
"ESSENTIAL  
HYPERTENSION"/ OR exp  
"BLOOD PRESSURE"/ OR exp  
"BLOOD PRESSURE  
DISORDERS"/ OR (high blood  
pressure).ti,ab OR (HBP).ti,ab  
OR (HTN).ti,ab OR (NCD).ti,ab  
OR (non\*communicable  
disease\*).ti,ab OR (chronic  
diseas\*).ti,ab OR (chronic  
condition\*).ti,ab OR (long term  
condition\*).ti,ab OR  
(hyperten\*).ti,ab OR  
(cardiovascular disease).ti,ab  
OR (heart disease).ti,ab OR  
(blood pressure).ti,ab)

(45 AND 72) [DT FROM 2010] Viewing (538)

19 Aug 19 - 13:36

## HDAS Export

### Strategy htn cinahl

[See full search strategy](#)

### Strategy 702832/102

| #   | Database | Search term                                                                                                                                                                                                                                                                                                                                                                                                                                                                                                                                                                                                                                                                                                                                                                                                                                               | Results |
|-----|----------|-----------------------------------------------------------------------------------------------------------------------------------------------------------------------------------------------------------------------------------------------------------------------------------------------------------------------------------------------------------------------------------------------------------------------------------------------------------------------------------------------------------------------------------------------------------------------------------------------------------------------------------------------------------------------------------------------------------------------------------------------------------------------------------------------------------------------------------------------------------|---------|
| 102 | CINAHL   | (exp DISASTERS/ OR exp "MASS CASUALTY INCIDENTS"/ OR exp "NATURAL DISASTERS"/ OR exp REFUGEES/ OR exp WAR/ OR exp STARVATION/ OR (humanitarian ADJ2 crisis).ti,ab OR (humanitarian ADJ2 crises).ti,ab OR (humanitarian ADJ2 emergenc*).ti,ab OR (humanitarian ADJ2 relief).ti,ab OR (humanitarian ADJ2 response).ti,ab OR (humanitarian ADJ2 agenc*).ti,ab OR (refugee*).ti,ab OR (asylum seeker*).ti,ab OR (evacuee*).ti,ab OR (evacuated*).ti,ab OR (war OR wars OR warfare).ti,ab OR (avalanche*).ti,ab OR (earthquake*).ti,ab OR (flood*).ti,ab OR (landslide*).ti,ab OR (tidal wave*).ti,ab OR (tsunami*).ti,ab OR (cyclon*).ti,ab OR (hurricane*).ti,ab OR (typhoon*).ti,ab OR (drought*).ti,ab OR (famine*).ti,ab OR (starvation*).ti,ab OR (displace* ADJ2 force*).ti,ab OR (displace* ADJ2 population*).ti,ab OR (displace* ADJ2 human).ti,ab OR | 1591    |



(displace\* ADJ2 internal\*).ti,ab  
OR (displace\* ADJ2  
person\*).ti,ab OR (displace\*  
ADJ2 people\*).ti,ab OR  
(conflict\* ADJ2 armed).ti,ab OR  
(conflict\* ADJ2 zone\*).ti,ab OR  
(conflict affected ADJ3  
population\*).ti,ab OR (conflict  
affected ADJ3 person\*).ti,ab  
OR (conflict affected ADJ3  
people\*).ti,ab OR (conflict  
affected ADJ3 communit\*).ti,ab  
OR (disaster\* ADJ3  
natural).ti,ab OR (disaster\*  
ADJ3 victim\*).ti,ab OR  
(disaster\* ADJ3 plan\*).ti,ab OR  
(disaster\* ADJ3 relief\*).ti,ab OR  
(persecution).ti,ab) AND (exp  
HYPERTENSION/ OR exp  
"ESSENTIAL  
HYPERTENSION"/ OR exp  
"NONCOMMUNICABLE  
DISEASES"/ OR exp  
"CHRONIC DISEASE"/ OR exp  
"BLOOD PRESSURE"/ OR  
(high blood pressure).ti,ab OR  
(HBP).ti,ab OR (HTN).ti,ab OR  
(NCD).ti,ab OR  
(non\*communicable  
disease\*).ti,ab OR (chronic  
diseas\*).ti,ab OR (chronic  
condition\*).ti,ab OR (long term  
condition\*).ti,ab OR  
(hyperten\*).ti,ab OR  
(cardiovascular disease).ti,ab  
OR (heart disease).ti,ab OR  
(blood pressure).ti,ab)

(85 AND 101) [DT FROM 2010] Viewing (964)

Proquest IBSS Search Strategy

Set#: S3

Searched for: MAINSUBJECT.EXACT("Refugees") OR MAINSUBJECT.EXACT("Landslides & mudslides") OR MAINSUBJECT.EXACT("Floods") OR MAINSUBJECT.EXACT("Tidal waves") OR MAINSUBJECT.EXACT("Earthquakes") OR MAINSUBJECT.EXACT("Disasters") OR MAINSUBJECT.EXACT("Aftershocks") OR MAINSUBJECT.EXACT("Avalanches") OR MAINSUBJECT.EXACT("Tsunamis") OR OR MAINSUBJECT.EXACT("War") OR MAINSUBJECT.EXACT("Starvation") OR MAINSUBJECT.EXACT("Famine") OR MAINSUBJECT.EXACT("Hunger")

Databases: International Bibliography of the Social Sciences (IBSS)

Results: 69165

Set#: S6

Searched for: ab(humanitarian work) OR ab(humanitarian worker) OR ab(humanitarian crisis) OR ab(humanitarian aid) OR ab(humanitarian intervention) OR ab(disaster) OR ab(mass casualty events) OR ab(refugee\*) OR ab(asylum seek\*) OR ab(evacuee\*)

Databases: International Bibliography of the Social Sciences (IBSS)

Results: 24649

Set#: S7

Searched for: ab(evacuated\*) OR ab(internal displaced person) OR ab("conflict affected") OR ab(persecution) OR ab(war) OR ab(wars) OR ab(warfare) OR ab("armed conflict") OR ab(avalanche\*) OR ab(earthquake\*)

Databases: International Bibliography of the Social Sciences (IBSS)

Results: 103513

Set#: S8

Searched for: ab(flood\*) OR ab(landslide\*) OR ab("tidal wave\*") OR ab(tsunami\*) OR ab("cyclonic storm") OR ab(hurricane\*) OR ab(drought\*`) OR ab(famine\*) OR ab(starvation)

Databases: International Bibliography of the Social Sciences (IBSS)

Results: 12854

Set#: S9

Searched for: S3 OR S6 OR S7 Or S8

Databases: International Bibliography of the Social Sciences (IBSS)

These databases are searched for part of your query.

Results: 169520

Set#: S10

Searched for: MAINSUBJECT.EXACT("Chronic illnesses") OR MAINSUBJECT.EXACT("Blood pressure") OR MAINSUBJECT.EXACT("Hypertension")

Databases: International Bibliography of the Social Sciences (IBSS)

Results: 1982

Set#: S11

Searched for: ab("high blood pressure") OR ab("HBP") OR ab("HTN") OR ab(hyperten\*) OR ab(non-communicable disease\*) OR ab("NCD\*") OR ab("chronic disease\*") OR ab("chronic condition\*") OR ab("long term condition\*")

Databases: International Bibliography of the Social Sciences (IBSS)

Results: 3791

Set#: S12

Searched for: ab("cardiovascular disease") OR ab("heart disease") OR ab("blood pressure")

Databases: International Bibliography of the Social Sciences (IBSS)

Results: 2456

Set#: S13

Searched for: s10 OR s11 OR s12

Databases: International Bibliography of the Social Sciences (IBSS)

These databases are searched for part of your query.

Results: 6324

Set#: S14

Searched for: s9 AND s13

Databases: International Bibliography of the Social Sciences (IBSS)

These databases are searched for part of your query.

Results: 133

## Web of Science

| Set | Results Save History / Create AlertOpen Saved Sets History                                                                                                                                                                                                                                                                                                                                                                                                                                                                                                                                                                                                                       | Edit                 | Combine Sets AND OR      | Delete Sets Select All Delete |
|-----|----------------------------------------------------------------------------------------------------------------------------------------------------------------------------------------------------------------------------------------------------------------------------------------------------------------------------------------------------------------------------------------------------------------------------------------------------------------------------------------------------------------------------------------------------------------------------------------------------------------------------------------------------------------------------------|----------------------|--------------------------|-------------------------------|
| # 3 | <a href="#">2,996</a> #2 AND #1<br><i>Indexes=SCI-EXPANDED, SSCI, A&amp;HCI, CPCIS, CPCI-SSH, ESCI Timespan=All years</i>                                                                                                                                                                                                                                                                                                                                                                                                                                                                                                                                                        | <a href="#">Edit</a> | <input type="checkbox"/> | <input type="checkbox"/>      |
| # 2 | <a href="#">1,014,576</a> <b>TOPIC:</b> (("high blood pressure") OR ("HBP") OR ("HTN") OR (hyperten*) OR (non-communicable disease*) OR ("NCD*") OR ("chronic disease*") OR ("chronic condition*") OR ("long term condition*") OR ("cardiovascular disease") OR ("heart disease") OR ("blood pressure"))<br><i>Indexes=SCI-EXPANDED, SSCI, A&amp;HCI, CPCIS, CPCI-SSH, ESCI Timespan=All years</i>                                                                                                                                                                                                                                                                               | <a href="#">Edit</a> | <input type="checkbox"/> | <input type="checkbox"/>      |
| # 1 | <a href="#">814,010</a> <b>TOPIC:</b> ((humanitarian work) OR (humanitarian worker) OR (humanitarian crisis) OR (humanitarian aid) OR (humanitarian intervention) OR (disaster) OR (mass casualty event*) OR (refugee*) OR (asylum seek*) OR (evacuee*) OR (evacuated*) OR (internal displaced person) OR ("conflict affected") OR (persecution) OR (war) OR (wars) OR (warfare) OR ("armed conflict") OR (avalanche*) OR (earthquake*) OR (flood*) OR (landslide*) OR ("tidal wave*") OR (tsunami*) OR ("cyclonic storm") OR (hurricane*) OR (drought*) OR (famine*) OR (starvation))<br><i>Indexes=SCI-EXPANDED, SSCI, A&amp;HCI, CPCIS, CPCI-SSH, ESCI Timespan=All years</i> |                      |                          |                               |

## Cochrane

#1 MeSH descriptor: [Natural Disasters] explode all trees 52

#2

MeSH descriptor: [Mass Casualty Incidents] explode all trees

MeSH

21

#3

MeSH descriptor: [Refugees] explode all trees

MeSH

100

#4

MeSH descriptor: [Armed Conflicts] explode all trees

MeSH

127

#5

MeSH descriptor: [Avalanches] explode all trees

MeSH

1

#6

MeSH descriptor: [Earthquakes] explode all trees

MeSH

33

#7

MeSH descriptor: [Floods] explode all trees

MeSH

3

#8

MeSH descriptor: [Landslides] explode all trees

MeSH

0

#9

MeSH descriptor: [Tidal Waves] explode all trees

MeSH

2

#10

MeSH descriptor: [Tsunamis] explode all trees

MeSH

2

#11

MeSH descriptor: [Cyclonic Storms] explode all trees

MeSH

6

#12

MeSH descriptor: [Droughts] explode all trees

MeSH

4

#13

MeSH descriptor: [Starvation] explode all trees

MeSH

47

#14

MeSH descriptor: [Relief Work] explode all trees

MeSH

63

#15

{OR #1-#14}

Limits

409

#16

((humanitarian work) OR (humanitarian worker) OR (humanitarian crisis) OR (humanitarian aid) OR (humanitarian intervention) OR (disaster) OR (mass casualty event\*) OR (refugee\*) OR (asylum seek\*) OR (evacuee\*) OR (evacuated\*) OR (internal displaced person) OR ("conflict affected") OR (persecution) OR (war) OR (wars) OR (warfare) OR ("armed conflict") OR (avalanche\*) OR (earthquake\*) OR (flood\*) OR (landslide\*) OR ("tidal wave\*") OR (tsunami\*) OR ("cyclonic storm") OR (hurricane\*) OR (drought\*) OR (famine\*) OR (starvation)):ti,ab,kw

S Limits

2341

#17

#15 OR #16

Limits

2424

#18

MeSH descriptor: [Hypertension] explode all trees

MeSH

16744

#19

MeSH descriptor: [Essential Hypertension] explode all trees

MeSH

135

#20

MeSH descriptor: [Noncommunicable Diseases] explode all trees

MeSH

5

#21

MeSH descriptor: [Chronic Disease] explode all trees

MeSH

12612

#22

MeSH descriptor: [Blood Pressure] explode all trees

MeSH

26751

#23

{OR #18-#22}

Limits

47340

#24

((("high blood pressure") OR ("HBP") OR ("HTN") OR (hyperten\*) OR (non-communicable disease\*) OR ("NCD\*") OR ("chronic disease\*") OR ("chronic condition\*") OR ("long term condition\*") OR ("cardiovascular disease") OR ("heart disease") OR ("blood pressure"))):ti,ab,kw

S Limits

157027

#25

#23 OR #24

Limits

157463

#26

#17 AND #25

Limits

**154**



Total = 20778

After deduplication:
