# Supplementary material for: A systematic review of the burden of hypertension, access to services and patient views of hypertension in humanitarian crisis settings
Source: PubMed Central journal article supplement (PMC7654140; doi:10.1136/bmjgh-2020-002440), 2020-11-09
Supplement: bmjgh-2020-002440supp003.pdf [file bmjgh-2020-002440supp003.pdf]

## Appendix Three:

Articles retrieved from the data base searches excluded at the full text stage

| Authors and Title                                                                                                                                                                      | Year | Reason for exclusion                                      |
|----------------------------------------------------------------------------------------------------------------------------------------------------------------------------------------|------|-----------------------------------------------------------|
| Adel: San Antonio refugees: Their demographics, healthcare profiles, and how to better serve them                                                                                      | 2019 | Cannot differentiate populations                          |
| Adu-Boahene: Health-Needs Assessment for West African Immigrants in Greater Providence, RI                                                                                             | 2017 | Cannot differentiate populations                          |
| Al Alawneh: Pharmacists in humanitarian crisis settings: Assessing the impact of pharmacist-delivered home medication management review service to Syrian refugees in Jordan           | 2019 | Wrong article type                                        |
| Amini: Quality of life in the Iranian Blind War Survivors in 2007: a cross-sectional study                                                                                             | 2010 | Study population selected on the basis of another disease |
| Anon: Chronic disease post Hurricane Katrina                                                                                                                                           | 2016 | Cannot access                                             |
| Anon: Launching a national surveillance system after an earthquake -- Haiti, 2010                                                                                                      | 2010 | Wrong article type                                        |
| Aoki: Effect of the Great East Japan Earthquake on Cardiovascular Diseases                                                                                                             | 2013 | No BP measured                                            |
| Arrieta: Insuring continuity of care for chronic disease patients after a disaster: key preparedness elements                                                                          | 2008 | No BP measured                                            |
| Asgary: Communicable and Non-Communicable Diseases Among Recent Immigrants with Implications for Primary care; a Comprehensive Immigrant Health Approach                               | 2011 | Cannot differentiate populations                          |
| Ay: The Perceived Barriers of Access to Health Care Among a Group of Non-camp Syrian Refugees in Jordan                                                                                | 2016 | No BP measured                                            |
| Ayappa: The Association between Health Conditions in World Trade Center Responders and Sleep-Related Quality of Life and Sleep Complaints                                              | 2019 | No BP measured                                            |
| Baggett: Florida disasters and chronic disease conditions                                                                                                                              | 2006 | Wrong article type                                        |
| Bani Hani: Heart Disease in Adult Syrian Refugees: Experience at Jordan University Hospital                                                                                            | 2019 | Study population selected on the basis of another disease |
| Bardenheier: Trends in Chronic Diseases Reported by Refugees Originating from Burma Resettling to the United States from Camps Versus Urban Areas During 2009-2016                     | 2019 | Conflict out of date range                                |
| Barnett: Spectrum of Illness in International Migrants Seen at GeoSentinel Clinics in 1997-2009, Part 1: US-Bound Migrants Evaluated by Comprehensive Protocol-Based Health Assessment | 2013 | Cannot differentiate populations                          |
| Basu: Reducing chronic disease through changes in food aid: A microsimulation of nutrition and cardiometabolic disease among Palestinian refugees in the Middle East                   | 2018 | Wrong article type                                        |
| Baydoun: Hurricane Katrina and acute myocardial infarction: Ten years after the storm                                                                                                  | 2016 | Wrong article type                                        |
| Bayraktar: Elderly people as vulnerable group in disasters                                                                                                                             | 2017 | Wrong article type                                        |

|                                                                                                                                                                                                     |      |                                                           |
|-----------------------------------------------------------------------------------------------------------------------------------------------------------------------------------------------------|------|-----------------------------------------------------------|
| Beiser: The health of immigrants and refugees in Canada                                                                                                                                             | 2005 | Wrong article type                                        |
| Beldjebel: Infectious diseases among Iraqi refugees in Lebanon                                                                                                                                      | 2012 | Wrong article type                                        |
| Beldjebel: Infectious diseases among refugees in Beirut                                                                                                                                             | 2012 | Wrong article type                                        |
| Beldjebel: Infectious diseases in refugees coming from Syria and Iraq to Lebanon                                                                                                                    | 2014 | Wrong article type                                        |
| Benca: Infection among displaced population Port au Prince: Comparison of early post quake and year after earthquake periods                                                                        | 2011 | Wrong article type                                        |
| Bertelsen: Primary Care Screening Methods and Outcomes for Asylum Seekers in New York City                                                                                                          | 2018 | Blood pressure measured but no diagnosis of hypertension  |
| Berthold: Comorbid mental and physical health and health access in Cambodian refugees in the US                                                                                                     | 2014 | Population not directly affected                          |
| Bhatta: Chronic Disease Burden Among Bhutanese Refugee Women Aged 18-65 Years Resettled in Northeast Ohio, United States, 2008-2011                                                                 | 2015 | Conflict out of date range                                |
| Bhoopathy: Cardiovascular risk factors among men living in an internally displaced persons camp in Kenya                                                                                            | 2014 | Wrong article type                                        |
| Bich: Impacts of flood on health: epidemiologic evidence from Hanoi, Vietnam                                                                                                                        | 2011 | Cannot differentiate populations                          |
| Bischoff: Health and ill health of asylum seekers in Switzerland: an epidemiological study                                                                                                          | 2009 | No BP measured                                            |
| Borgschulte: Health care provision for refugees in Germany - one-year evaluation of an outpatient clinic in an urban emergency accommodation                                                        | 2018 | Cannot differentiate populations                          |
| Bouille: Cardiovascular Disease among Syrian refugees: a descriptive study of patients in two Médecins Sans Frontières clinics in northern Lebanon                                                  | 2019 | Study population selected on the basis of another disease |
| Brackbill: Physical health consequences of being injured during the world trade center terrorist attacks on september 11, 2001                                                                      | 2013 | Study population selected on the basis of another disease |
| Burns: Health status of returning refugees, internally displaced persons, and the host community in a post-conflict district in northern Sri Lanka: a cross-sectional survey                        | 2018 | No BP measured                                            |
| Byberg: Cardiovascular disease incidence and survival: Are migrants always worse off?                                                                                                               | 2016 | No BP measured                                            |
| Bydzovsky: Experience with migrants on Balkan Route from the Field Hospital on the Slovenian-Croatian Border                                                                                        | 2016 | Cannot differentiate populations                          |
| Centers for Disease, Control and Prevention: Assessment of health-related needs after Hurricanes Katrina and Rita--Orleans and Jefferson Parishes, New Orleans area, Louisiana, October 17-22, 2005 | 2006 | No BP measured                                            |
| Centers for Disease, Control and Prevention: Illness surveillance and rapid needs assessment among Hurricane Katrina evacuees--Colorado, September 1-23, 2005                                       | 2006 | No BP measured                                            |
| Centers for Disease, Control and Prevention: Morbidity surveillance after Hurricane Katrina--Arkansas, Louisiana, Mississippi, and Texas, September 2005                                            | 2006 | No BP measured                                            |

|                                                                                                                                                                                                           |      |                                                          |
|-----------------------------------------------------------------------------------------------------------------------------------------------------------------------------------------------------------|------|----------------------------------------------------------|
| Centers for Disease, Control and Prevention: Rapid assessment of health needs and resettlement plans among Hurricane Katrina evacuees--San Antonio, Texas, September 2005                                 | 2006 | No BP measured                                           |
| Centers for Disease, Control and Prevention: Rapid assessment of the needs and health status of older adults after Hurricane Charley--Charlotte, DeSoto, and Hardee Counties, Florida, August 27-31, 2004 | 2004 | No BP measured                                           |
| Chaaban: Recent changes in welfare indicators among Palestinian refugees in Lebanon: a comparative study of two cross-sectional datasets                                                                  | 2019 | Wrong article type                                       |
| Chan: Characteristics and health outcomes of internally displaced population in unofficial rural self-settled camps after the 2005 Kashmir, Pakistan earthquake                                           | 2010 | No BP measured                                           |
| Chan: Chronic health needs immediately after natural disasters in middle-income countries: the case of the 2008 Sichuan, China earthquake                                                                 | 2011 | Cannot differentiate populations                         |
| Chan: Chronic health needs immediately after natural disasters in middle-income countries: the case of the 2008 Sichuan, China earthquake                                                                 | 2010 | Cannot differentiate populations                         |
| Chan: Comparison of health needs of older people between affected rural and urban areas after the 2005 Kashmir, Pakistan earthquake                                                                       | 2009 | No BP measured                                           |
| Chandra: Prevalence of chronic disease risk factors in 35- to 44-year-old humanitarian arrivals to New South Wales (NSW), Australia                                                                       | 2019 | Cannot differentiate populations                         |
| Charles-Larco: Prise en charge des patients diabétiques après le séisme du 12 janvier 2010 en Haïti Management of diabetic patients after the earthquake in Haiti January 12, 2010                        | 2011 | Wrong article type                                       |
| Chen: Acute cardiovascular effects of the Wenchuan earthquake: ambulatory blood pressure monitoring of hypertensive patients                                                                              | 2009 | Blood pressure measured but no diagnosis of hypertension |
| Chen: Emotions of depression and anxiety from earthquake have significant influence on diabetes morbidity at the disaster areas after 2008 5.12 Sichuan earthquake                                        | 2010 | Wrong article type                                       |
| Cho: Weight gain and the risk of metabolic syndrome among North Korean refugees living in South Korea - An example of thrifty hypothesis                                                                  | 2010 | Wrong article type                                       |
| Cline: The resettlement experiences of African refugee single mothers and hypertension management in United States                                                                                        | 2014 | Wrong article type                                       |
| Collins: Cardiovascular disease risk and prevention amongst Syrian refugees: mixed methods study of Médecins Sans Frontières programme in Jordan                                                          | 2017 | Blood pressure measured but no diagnosis of hypertension |
| Cope: Estimating the factors associated with health status and access to care among Iraqis displaced in Jordan and Syria using population assessment data                                                 | 2012 | Wrong article type                                       |
| Culhane-Pera: Cardiovascular disease risks in Hmong refugees from Wat Tham Krabok, Thailand                                                                                                               | 2009 | Conflict out of date range                               |
| Da Silva: Global health within borders: Outlook of health screening among Iraqi and Sudanese refugee community and the impact of language barrier the patient self-advocacy                               | 2015 | Wrong article type                                       |

|                                                                                                                                                                                                                                        |      |                                                           |
|----------------------------------------------------------------------------------------------------------------------------------------------------------------------------------------------------------------------------------------|------|-----------------------------------------------------------|
| Dalmar: Living in ethnic-enclave neighborhoods may attenuate the negative effect of acculturation on blood pressure in refugees and maintain immigrant health effect                                                                   | 2017 | Wrong article type                                        |
| Damiri: Metabolic syndrome among overweight and obese adults in Palestinian refugee camps                                                                                                                                              | 2018 | Study population selected on the basis of another disease |
| Darvishi: Investigating Prevalence and Pattern of Long-term Cardiovascular Disorders in Sulphur Mustard-exposed Victims and Determining Proper Biomarkers for Early Defining, Monitoring and Analysis of Patients' Feedback on Therapy | 2017 | Wrong article type                                        |
| Deere: Incidence of acute myocardial infarction and hurricane katrina: Four-fold increase eleven years after the storm                                                                                                                 | 2018 | Wrong article type                                        |
| Del Pinto: Health status of Afro-Asian refugees in an Italian urban area: a cross-sectional monocentric study                                                                                                                          | 2018 | Cannot differentiate populations                          |
| Di Castelnuovo: Effect of the l'aquila earthquake on metabolic syndrome in survivors from the 2009 earthquake in Italy                                                                                                                 | 2012 | Wrong article type                                        |
| DiGeronimo: Impact of hurricane Irma on prescription fill patterns in a medicare population with chronic conditions                                                                                                                    | 2018 | Wrong article type                                        |
| Donker: Chronic diseases of victims and controls before and after disaster                                                                                                                                                             | 2005 | Wrong article type                                        |
| Doocy: Guidelines and mHealth to Improve Quality of Hypertension and Type 2 Diabetes Care for Vulnerable Populations in Lebanon: Longitudinal Cohort Study                                                                             | 2017 | Cannot differentiate populations                          |
| Dookeran: Chronic disease and its risk factors among refugees and asylees in Massachusetts, 2001-2005                                                                                                                                  | 2010 | Blood pressure measured but no diagnosis of hypertension  |
| Dorman: Health Status of North Korean Refugees in Toronto: A Community Based Participatory Research Study                                                                                                                              | 2017 | Cannot differentiate populations                          |
| Dudova: Six month follow up in communicable versus non-communicable diseases in an Iraqi refugee camp                                                                                                                                  | 2016 | Cannot differentiate populations                          |
| Ebner: Increase in metabolic diseases following the Fukushima triple disaster: A retrospective study of Kawauchi Village with long-term follow-up                                                                                      | 2015 | Wrong article type                                        |
| El Arnaout: Assessment of the health needs of Syrian refugees in Lebanon and Syria's neighboring countries                                                                                                                             | 2019 | Wrong article type                                        |
| Fahd: Non-communicable disease risk factors in Palestine refugees in Lebanon: A descriptive study                                                                                                                                      | 2018 | Wrong article type                                        |
| Feldman: Examining the impact of captivity in men and women on the slaves returning to south Sudan                                                                                                                                     | 2014 | Wrong article type                                        |
| Ferdinand: The Hurricane Katrina disaster: focus on the hypertensive patient                                                                                                                                                           | 2005 | Wrong article type                                        |
| Fergus: Volcanic post traumatic stress and the impact on cardiometabolic health                                                                                                                                                        | 2012 | Wrong article type                                        |
| Frost: Determining Physical and Mental Health Conditions Present in Older Adult Refugees: A Mini-Review                                                                                                                                | 2019 | Cannot differentiate populations                          |
| Führer: Morbidity of asylum seekers in a medium-sized German city                                                                                                                                                                      | 2016 | No BP measured                                            |
| Fuse: Onsite medical rounds and fact-finding activities conducted by Nippon Medical School in Miyagi prefecture after the Great East Japan Earthquake 2011                                                                             | 2011 | No BP measured                                            |

|                                                                                                                                                                                                                              |      |                                                           |
|------------------------------------------------------------------------------------------------------------------------------------------------------------------------------------------------------------------------------|------|-----------------------------------------------------------|
| Gómez-Restrepo: Enfermedades crónicas en población afectada por el conflicto armado en Colombia, 2015                                                                                                                        | 2017 | Duplicate                                                 |
| Gallegos: Living well multicultural-does it change behaviours in migrants to reduce the risk of chronic disease?                                                                                                             | 2016 | Wrong article type                                        |
| Gammoh: A preliminary description of medical complaints and medication consumption among 375 Syrian refugees residing in North Jordan                                                                                        | 2016 | Cannot differentiate populations                          |
| Gammouh: Chronic diseases, lack of medications, and depression among Syrian refugees in Jordan, 2013-2014                                                                                                                    | 2015 | No BP measured                                            |
| Gardemann: A record of morbidity and medical request profiles in international humanitarian aid, taking the earthquake in Bam in Iran in 2003 as an example                                                                  | 2009 | Cannot differentiate populations                          |
| Gerin: Sustained blood pressure increase after an acute stressor: the effects of the 11 September 2001 attack on the New York City World Trade Center                                                                        | 2005 | Population not directly affected                          |
| Gerritsen: [Mental and physical health problems of, and the use of healthcare by, Afghan, Iranian and Somali asylum seekers and refugees]                                                                                    | 2006 | Cannot differentiate populations                          |
| Gerritsen: Physical and mental health of Afghan, Iranian and Somali asylum seekers and refugees living in the Netherlands                                                                                                    | 2006 | No BP measured                                            |
| Ghattas: Poverty, food insecurity, and health of Palestinian refugees in Lebanon and recently displaced from Syria to Lebanon: Findings from the 2015 socioeconomic household survey                                         | 2018 | Wrong article type                                        |
| Ghosh: Rapid needs assessment among Hurricane Katrina evacuees in metro-Denver                                                                                                                                               | 2007 | Cannot differentiate populations                          |
| Giorgini: Long-term blood pressure changes induced by the 2009 L'Aquila earthquake: assessment by 24 h ambulatory monitoring                                                                                                 | 2013 | Study population selected on the basis of another disease |
| Golub: Impact of Length of Residence in the United States on Risk of Diabetes and Hypertension in Resettled Refugees                                                                                                         | 2018 | Cannot differentiate populations                          |
| Goosen: THE RELATIONSHIP BETWEEN POST TRAUMATIC STRESS DISORDER AND HYPERTENSION AMONG 105 180 ASYLUM SEEKERS IN THE NETHERLANDS                                                                                             | 2011 | No BP measured                                            |
| Gordon: Lessons Learned from a Medical Response Team 45 Days Post Hurricane Maria in Puerto Rico                                                                                                                             | 2019 | No BP measured                                            |
| Guha-Sapir: Short communication: patterns of chronic and acute diseases after natural disasters - a study from the International Committee of the Red Cross field hospital in Banda Aceh after the 2004 Indian Ocean tsunami | 2007 | Cannot differentiate populations                          |
| Habib: Associations between life conditions and multi-morbidity in marginalized populations: the case of Palestinian refugees                                                                                                | 2014 | Cannot differentiate populations                          |
| Hameed: Acute myocardial infarction before and after the storm: Hurricane Katrina                                                                                                                                            | 2012 | Wrong article type                                        |
| Hanna: Delivering healthcare to the refugee population in Pittsburgh                                                                                                                                                         | 2015 | Wrong article type                                        |
| Hanzawa: Below-the-knee DVT related with cerebral infarction after Mid Niigata Prefecture Earthquake 2004                                                                                                                    | 2014 | Wrong article type                                        |
| Hanzawa: Hypertension is a risk factor for DVT in Japanese                                                                                                                                                                   | 2011 | Wrong article type                                        |

|                                                                                                                                                                         |      |                                                           |
|-------------------------------------------------------------------------------------------------------------------------------------------------------------------------|------|-----------------------------------------------------------|
| quake residents                                                                                                                                                         |      |                                                           |
| Hanzawa: Increasing of ischemic stroke in residents with DVT after mid Niigata prefecture earthquake                                                                    | 2011 | Wrong article type                                        |
| Hasegawa: Emergency Responses and Health Consequences after the Fukushima Accident; Evacuation and Relocation                                                           | 2016 | Wrong article type                                        |
| Hashimoto: Influence of post-disaster evacuation on incidence of metabolic syndrome                                                                                     | 2017 | Blood pressure measured but no diagnosis of hypertension  |
| He: Acute changes of blood pressure and heart rate induced by a strong earthquake                                                                                       | 2010 | Blood pressure measured but no diagnosis of hypertension  |
| Henry: Violence and the body: somatic expressions of trauma and vulnerability during war                                                                                | 2006 | Wrong article type                                        |
| Higgins: Role of the Ambulatory Care Clinical Pharmacist in Management of a Refugee Patient Population at a University-Based Refugee Healthcare Clinic                  | 2019 | Study population selected on the basis of another disease |
| Holman: Terrorism, acute stress, and cardiovascular health: a 3-year national study following the September 11th attacks                                                | 2008 | Population not directly affected                          |
| Holt: Hurricane Katrina related experiences and blood pressure control in older adults: Findings from cosmo                                                             | 2012 | Wrong article type                                        |
| Horikoshi: The effect of telephone support to evacuees with risks of hypertension and diabetes mellitus after a disaster: the Fukushima Health Management Survey        | 2017 | No BP measured                                            |
| Hozawa: Tohoku medical megabank project community-based cohort study                                                                                                    | 2019 | Wrong article type                                        |
| Hu: Change characteristics of artery blood pressure in people with starvation and refeeding                                                                             | 2011 | Wrong article type                                        |
| Hung: Disease pattern and chronic illness in rural China: the Hong Kong Red Cross basic health clinic after 2008 Sichuan earthquake                                     | 2013 | Cannot differentiate populations                          |
| Hung: Disease patterns in a rural setting three weeks after the Sichuan earthquake-Hong Kong red cross basic health clinic in Yanmen town                               | 2010 | Wrong article type                                        |
| Hussain: Burden of non-communicable diseases in Iraq after the 2003 war                                                                                                 | 2019 | Cannot differentiate populations                          |
| Ishibashi: Study of headache after the Great East Japan earthquake in Iwate coast area (1) report of 2012                                                               | 2015 | Wrong article type                                        |
| Israfilov: The distribution of arterial hypertension as risk factor of coronary disease among refugees men at 20-59 age in Sumgait City                                 | 2006 | Cannot access                                             |
| Ito: Transient increase in blood pressure after the Great East Japan Earthquake in patients with hypertension living around Tokyo                                       | 2013 | Wrong article type                                        |
| Jamil: Self-rated Health and Medical Conditions in Refugees and Immigrants from the Same Country of Origin                                                              | 2015 | Conflict out of date range                                |
| Jen: Sex differences and predictors of changes in body weight and noncommunicable diseases in a random, newly-arrived group of refugees followed for two years: Erratum | 2018 | Blood pressure measured but no diagnosis of hypertension  |
| Jhung: Chronic disease and disasters medication demands of                                                                                                              | 2007 | No BP measured                                            |

|                                                                                                                                                                                                                             |      |                                                           |
|-----------------------------------------------------------------------------------------------------------------------------------------------------------------------------------------------------------------------------|------|-----------------------------------------------------------|
| Hurricane Katrina evacuees                                                                                                                                                                                                  |      |                                                           |
| Jiao: DID Hurricane Katrina continue to affect the incidence of acute coronary syndromes in New Orleans?                                                                                                                    | 2011 | Wrong article type                                        |
| Jiao: Effect of Hurricane Katrina on incidence of acute myocardial infarction in New Orleans three years after the storm                                                                                                    | 2012 | Study population selected on the basis of another disease |
| Jonassen: Socioeconomic status and chronic disease in Palestinians living in and outside refugee camps in the West Bank and the Gaza Strip: An observational study                                                          | 2018 | Wrong article type                                        |
| Jonassen: Socio-economic status and chronic disease in the West Bank and the Gaza Strip: in and outside refugee camps                                                                                                       | 2018 | Cannot differentiate populations                          |
| Joob: Tayland'daki buyuk selde, hipertansiyonlu hastalarin takibinde kayip sorunuBig flooding in thailand, the problem on loss following up of patients with hypertension                                                   | 2012 | Wrong article type                                        |
| Jordan: Heart disease among adults exposed to the September 11, 2001 World Trade Center disaster: results from the World Trade Center Health Registry                                                                       | 2011 | Cannot differentiate populations                          |
| Kamkamidze: SELF-PERCEIVED HEALTH STATUS AND ILLNESSES AMONG INTERNALLY DISPLACED PEOPLE IN GEORGIA                                                                                                                         | 2018 | No BP measured                                            |
| Kario: Factors associated with the occurrence and magnitude of earthquake-induced increases in blood pressure                                                                                                               | 2001 | Wrong article type                                        |
| Kawasaki: The basic data for residents aged 16 years or older who received a comprehensive health check examinations in 2011-2012 as a part of the Fukushima Health Management Survey after the great East Japan earthquake | 2014 | Blood pressure measured but no diagnosis of hypertension  |
| Kayitesi: Acquisition of cardiovascular disease risk factors among refugees and immigrants: A longitudinal study                                                                                                            | 2015 | Wrong article type                                        |
| Khader: Treatment outcomes in a cohort of Palestine refugees with diabetes mellitus followed through use of E-Health over 3 years in Jordan                                                                                 | 2014 | Study population selected on the basis of another disease |
| Khan: REFUGEE HEALTH AND REHABILITATION: CHALLENGES AND RESPONSE                                                                                                                                                            | 2017 | Wrong article type                                        |
| Kim: Excess weight gain in nonobese North Korean refugees associated with increased risk of impaired fasting glucose                                                                                                        | 2014 | Wrong article type                                        |
| Kim: Post-Nargis medical care: experience of a Korean Disaster Relief Team in Myanmar after the cyclone                                                                                                                     | 2010 | No BP measured                                            |
| Kim: Prevalence of metabolic syndrome and its related factors among North Korean refugees in South Korea: A cross-sectional study                                                                                           | 2016 | Cannot differentiate populations                          |
| Kim: Prevalence of metabolic syndrome and its related factors among North Korean refugees in South Korea: A cross-sectional study                                                                                           | 2016 | Conflict out of date range                                |
| Kira: D. The physical and mental status of Iraqi refugees and its etiology                                                                                                                                                  | 2007 | Cannot differentiate populations                          |
| Kloner: Lessons learned about stress and the heart after major earthquakes                                                                                                                                                  | 2019 | Wrong article type                                        |
| Konno: Blood pressure among public employees after the Great East Japan Earthquake: the Watari study                                                                                                                        | 2013 | Population not directly affected                          |
| Konno: Blood pressure changes over 2 years after the great                                                                                                                                                                  | 2013 | Wrong article type                                        |

|                                                                                                                                                                             |      |                                                           |
|-----------------------------------------------------------------------------------------------------------------------------------------------------------------------------|------|-----------------------------------------------------------|
| east japan earthquake and associated cardiovascular risk factors: The watari study                                                                                          |      |                                                           |
| Konno: Blood Pressure Elevation Lasting Longer Than 1 Year Among Public Employees After the Great East Japan Earthquake: The Watari Study                                   | 2017 | Population not directly affected                          |
| Konno: Prolonged pressor effects of the great east Japan earthquake in public employees: The watari study                                                                   | 2012 | Wrong article type                                        |
| Kory: Health ramifications of the Gush Katif evacuation                                                                                                                     | 2013 | Cannot differentiate populations                          |
| Krcmery: Early versus late onset infections during Haiti earthquake 2010                                                                                                    | 2013 | Wrong article type                                        |
| Kumar: Noninfectious disease among the Bhutanese refugee population at a United States urban clinic                                                                         | 2014 | Conflict out of date range                                |
| Kumar: The burden of chronic disease among the bhutanese refugee population at a US Urban clinic                                                                            | 2011 | Wrong article type                                        |
| Kuroda: Health care response to the tsunami in Taro District, Miyako City, Iwate Prefecture                                                                                 | 2011 | No methods                                                |
| Lenane: Association of Post-Traumatic Stress Disorder Symptoms Following Hurricane Katrina With Incident Cardiovascular Disease Events Among Older Adults With Hypertension | 2019 | No BP measured                                            |
| Li: Acute effects of the YaAn earthquake on blood pressure among hospitalized patients in the department of cardiology                                                      | 2014 | Wrong article type                                        |
| Li: YaAn earthquake increases blood pressure among hospitalized patients                                                                                                    | 2016 | Blood pressure measured but no diagnosis of hypertension  |
| Lipsky: World Trade Center disaster effect on blood pressure                                                                                                                | 2002 | Wrong article type                                        |
| Lobjanidze: COMPARISON OF INTERFERENCE OF HYPERTENSION AND SLEEP DISORDERS AMONG NORMAL ADULT POPULATION AND REFUGEES                                                       | 2016 | Wrong article type                                        |
| Ludwig: When you are here, you have high blood pressure: Liberian refugees' health and access to healthcare in Staten Island, NY                                            | 2016 | No BP measured                                            |
| MacPherson: Health of displaced Albanian Kosovars in the former Yugoslav Republic of Macedonia: fitness to travel and health outcomes assessment                            | 2002 | Cannot differentiate populations                          |
| Malik: Disease Status of Afghan Refugees and Migrants in Pakistan                                                                                                           | 2019 | No BP measured                                            |
| Malla: Analysis of Post Earthquake Disease Pattern in a Camp at Gyampesal Gorkha                                                                                            | 2016 | Study population selected on the basis of another disease |
| Mani: Relationship between particulate matter exposure and atherogenic profile in "Ground Zero" workers as shown by dynamic contrast enhanced MR imaging                    | 2013 | Military or service personnel                             |
| Markoglou: Epidemiologic characteristics of hypertension in the civilians of Kosovo after the war                                                                           | 2005 | Cannot differentiate populations                          |
| Marshall: Diabetes and Cardiovascular Disease Risk in Cambodian Refugees                                                                                                    | 2016 | Cannot differentiate populations                          |
| Massad: Metabolic syndrome among refugee women from the west bank, Palestine: A cross-sectional study                                                                       | 2018 | Cannot differentiate populations                          |
| McEniry: Early Life Displacement Due to Armed Conflict and                                                                                                                  | 2019 | Wrong article type                                        |



|                                                                                                                                                                                                                                               |      |                                  |
|-----------------------------------------------------------------------------------------------------------------------------------------------------------------------------------------------------------------------------------------------|------|----------------------------------|
| Violence, Early Nutrition, and Older Adult Hypertension, Diabetes, and Obesity in the Middle-Income Country of Colombia                                                                                                                       |      |                                  |
| McLeod: The health status of quota refugees screened by New Zealand's Auckland Public Health Service between 1995 and 2000                                                                                                                    | 2005 | No methods                       |
| Millin: A comparative analysis of two external health care disaster responses following Hurricane Katrina                                                                                                                                     | 2006 | Cannot differentiate populations |
| Misra: Chronic Health Conditions, Physical Activity and Dietary Behaviors of Bhutanese Refugees: A Houston-Based Needs Assessment                                                                                                             | 2016 | Conflict out of date range       |
| Moran: For What Illnesses Do Asylum Seekers and Undocumented Migrant Workers in Israel Seek Healthcare? An Analysis of Medical Visits at a Large Urgent Care Clinic for the Uninsured in Tel Aviv                                             | 2019 | No BP measured                   |
| Morrison: When Community Calls, We Collaborate! Community-Based Participatory Research With the Multilanguage Montagnard Refugee Community                                                                                                    | 2018 | Wrong article type               |
| Moscona: Increased incidence of acute coronary syndrome following hurricane Katrina in new Orleans: The impact continues                                                                                                                      | 2013 | Wrong article type               |
| Moscona: The effects of hurricane Katrina on acute myocardial infarction five years after the storm                                                                                                                                           | 2012 | Wrong article type               |
| Moscona: The Incidence, Risk Factors, and Chronobiology of Acute Myocardial Infarction Ten Years After Hurricane Katrina                                                                                                                      | 2019 | Population not directly affected |
| Mousa: Hyperglycémie, hypertension artérielle et facteurs de risque de ces maladies chez les réfugiés palestiniens pris en charge par l'UNRWA<br>Hyperglycaemia, hypertension and their risk factors among Palestine refugees served by UNRWA | 2010 | Duplicate                        |
| Mullins: Cohort reporting improves hypertension care for refugees                                                                                                                                                                             | 2012 | Wrong article type               |
| Mulugeta: Burden of Mental Illness and Non-communicable Diseases and Risk Factors for Mental Illness Among Refugees in Buffalo, NY, 2004-2014                                                                                                 | 2019 | Cannot differentiate populations |
| Murakami: A cross-sectional survey of blood pressure of a coastal city's resident victims of the 2011 Tohoku tsunami                                                                                                                          | 2013 | Cannot differentiate populations |
| Muramatsu: The course of blood pressure and diabetes and mood disorders among primary care patients after the Chuetsu earthquake in Japan                                                                                                     | 2005 | Wrong article type               |
| Mykhailichenko: Arterial hypertension is the key risk factor of vascular events in the conditions of war and economic blockade in the Donbass region                                                                                          | 2017 | Wrong article type               |
| Nakaya: Psychological Distress and the Risk of Withdrawing From Hypertension Treatment After an Earthquake Disaster                                                                                                                           | 2017 | No BP measured                   |
| Neria: Mental and physical health consequences of the September 11, 2001 (9/11) attacks in primary care: a longitudinal study                                                                                                                 | 2013 | Population not directly affected |
| Neupane: CHANGE IN BLOOD PRESSURE FOLLOWING NEPAL'S EARTHQUAKE: A COMPARATIVE CROSS-SECTIONAL STUDY                                                                                                                                           | 2016 | Wrong article type               |
| Nguyen: Prevalence of Chronic Disease and Their Risk Factors Among Iranian, Ukrainian, Vietnamese Refugees in California, 2002-2011                                                                                                           | 2016 | Cannot differentiate populations |

|                                                                                                                                                                                     |      |                                  |
|-------------------------------------------------------------------------------------------------------------------------------------------------------------------------------------|------|----------------------------------|
| Nishizawa: Salt-intake and risk of disaster hypertension among evacuees at shelter of the great East Japan earthquake                                                               | 2019 | Wrong article type               |
| Noe: Disaster-related injuries and illnesses treated by American Red Cross disaster health services during Hurricanes Gustav and Ike                                                | 2013 | Cannot differentiate populations |
| Ochi: The great East Japan earthquake disaster: a compilation of published literature on health needs and relief activities, march 2011-september 2012                              | 2013 | Wrong article type               |
| Odunukan: Addressing the care of chronic diseases in post disaster responses                                                                                                        | 2012 | Wrong article type               |
| Ohira: Changes in Cardiovascular Risk Factors After the Great East Japan Earthquake                                                                                                 | 2017 | Wrong article type               |
| Ohira: Changes in metabolic profiles among evacuees after the great east Japan earthquake: The Fukushima health management survey                                                   | 2014 | Wrong article type               |
| Petrarca: Retrospective evaluation of blood pressure changes after the 2009 L'Aquila earthquake                                                                                     | 2011 | Wrong article type               |
| Petrazzi: Changes in 24-hour ambulatory blood pressure monitoring during the 2009 earthquake at L'Aquila                                                                            | 2010 | Wrong article type               |
| Pfortmueller: Adult Asylum Seekers from the Middle East Including Syria in Central Europe: What Are Their Health Care Problems?                                                     | 2016 | No BP measured                   |
| Pfortmueller: Multimorbidity in adult asylum seekers: a first overview                                                                                                              | 2013 | No BP measured                   |
| Qato: Medication utilization in the Palestine refugee population in the middle east: A cross-country comparative analysis                                                           | 2014 | Wrong article type               |
| Ramphal: Medical and psychosocial needs of the Puerto Rican people after Hurricane Maria                                                                                            | 2018 | No BP measured                   |
| Redditt: Health status of newly arrived refugees in Toronto, Ont: Part 2: chronic diseases                                                                                          | 2015 | Cannot differentiate populations |
| Reed: Investigating the Refugee Health Disadvantage Among the U.S. Immigrant Population                                                                                             | 2017 | Cannot differentiate populations |
| Renteria-Ramos: Morbi-Mortality of the Victims of Internal Conflict and Poor Population in the Risaralda Province, Colombia                                                         | 2019 | No BP measured                   |
| Renzaho: Prevalence of vitamin D insufficiency and risk factors for type 2 diabetes and cardiovascular disease among African migrant and refugee adults in Melbourne: a pilot study | 2011 | Cannot differentiate populations |
| Rhodes: Development of obesity and related diseases in a prospective longitudinal cohort of African refugees compared to matched regional controls                                  | 2015 | Wrong article type               |
| Rhodes: Development of Obesity and Related Diseases in African Refugees After Resettlement to United States                                                                         | 2016 | Cannot differentiate populations |
| Ridenour: Displacement of the underserved: medical needs of Hurricane Katrina evacuees in West Virginia                                                                             | 2007 | No BP measured                   |
| Russo: Health profile and disease determinants among asylum seekers: a cross-sectional retrospective study from an Italian reception centre                                         | 2016 | No BP measured                   |
| Ryan: Determining Key Influences on Patient Ability to Successfully Manage Noncommunicable Disease After Natural Disaster                                                           | 2019 | Wrong article type               |
| Saito: Increased incidence of acute myocardial infarction after the great East Japan earthquake                                                                                     | 2012 | Wrong article type               |

|                                                                                                                                                                 |      |                                                           |
|-----------------------------------------------------------------------------------------------------------------------------------------------------------------|------|-----------------------------------------------------------|
| Salazar: Health Consequences of an Armed Conflict in Zamboanga, Philippines Using a Syndromic Surveillance Database                                             | 2018 | Cannot differentiate populations                          |
| Salazar: Increased incidence of acute myocardial infarction after the great East Japan earthquake                                                               | 2017 | Cannot differentiate populations                          |
| Salazar: Post-disaster health impact of natural hazards in the Philippines in 2013                                                                              | 2016 | Cannot differentiate populations                          |
| Saleh: mHealth use for non-communicable diseases care in primary health: patients' perspective from rural settings and refugee camps                            | 2018 | Wrong article type                                        |
| Saleh: Using Mobile Health to Enhance Outcomes of Noncommunicable Diseases Care in Rural Settings and Refugee Camps: Randomized Controlled Trial                | 2018 | Cannot differentiate populations                          |
| Sasabuchi: Effect of the 2016 Kumamoto earthquakes on preventable hospital admissions: a retrospective cohort study in Japan                                    | 2018 | No BP measured                                            |
| Sato: Risk Factors and Prevalence of Deep Vein Thrombosis After the 2016 Kumamoto Earthquakes                                                                   | 2019 | Study population selected on the basis of another disease |
| Satoh: Acute and subacute effects of the great East Japan earthquake on home blood pressure values                                                              | 2011 | Wrong article type                                        |
| Sawano: Non-communicable diseases in decontamination workers in areas affected by the Fukushima nuclear disaster: a retrospective observational study           | 2016 | Military or service personnel                             |
| Schnall: Disaster-Related Shelter Surveillance During the Hurricane Harvey Response - Texas 2017                                                                | 2019 | No BP measured                                            |
| Schnall: Disaster-Related Surveillance Among US Virgin Islands (USVI) Shelters During the Hurricanes Irma and Maria Response                                    | 2019 | No BP measured                                            |
| Schneider: Disparities in health and access to healthcare between asylum seekers and residents in Germany: a population-based cross-sectional feasibility study | 2015 | No BP measured                                            |
| Semere: Factors Associated with Refugee Acute Healthcare Utilization in Southern Connecticut                                                                    | 2018 | Cannot differentiate populations                          |
| Semere: Timing of refugee health assessments may be associated with acute healthcare utilization                                                                | 2016 | Wrong article type                                        |
| Serre-Delcor: Health Status of Asylum Seekers, Spain                                                                                                            | 2018 | No methods                                                |
| Shah: Disease pattern in earthquake affected areas of Pakistan: data from Kaghan valley                                                                         | 2010 | Cannot differentiate populations                          |
| Shahin: Diabetes care in refugee camps: the experience of UNRWA                                                                                                 | 2015 | Wrong article type                                        |
| Sharif: A Health Profile and Overview of Healthcare Experiences of Cambodian American Refugees and Immigrants Residing in Southern California                   | 2019 | Wrong article type                                        |
| Sharma: Chronic disease and related conditions at emergency treatment facilities in the New Orleans area after Hurricane Katrina                                | 2008 | No BP measured                                            |
| Shehab: Access to care among displaced Mississippi residents in FEMA travel trailer parks two years after Katrina                                               | 2008 | No BP measured                                            |
| Slama: Care of non-communicable diseases in emergencies                                                                                                         | 2017 | Wrong article type                                        |
| Smith: Health Conditions of Post-Resettlement African Refugees in Boise, Idaho                                                                                  | 2016 | Cannot differentiate populations                          |

|                                                                                                                                                                                               |      |                                                           |
|-----------------------------------------------------------------------------------------------------------------------------------------------------------------------------------------------|------|-----------------------------------------------------------|
| Sofia: Cardiovascular and Cerebrovascular Events Pre- and Post-Earthquake of 6 April 2009: The Abruzzo's Experience                                                                           | 2012 | Study population selected on the basis of another disease |
| Strand: Short-Term Public Health Impact of the July 22, 2011, Terrorist Attacks in Norway: A Nationwide Register-Based Study                                                                  | 2016 | No BP measured                                            |
| Stratta: Effects on health of the L'Aquila (Central Italy) 2009 earthquake                                                                                                                    | 2016 | Wrong article type                                        |
| Striuli: Changes in 24-h ambulatory blood pressure during the 2009 earthquake at L'Aquila: a new evaluation in the same patients                                                              | 2013 | Wrong article type                                        |
| Takahashi: Impact of a major natural disaster on longitudinal changes in cardiovascular risk factors in the general population                                                                | 2015 | Wrong article type                                        |
| Taleshan: Multimorbidity and mortality thereof, among non-western refugees and family reunification immigrants in Denmark - a register based cohort study                                     | 2018 | No BP measured                                            |
| Tamblyn: Patients from abroad becoming patients in everyday practice: torture survivors in primary care                                                                                       | 2011 | Cannot differentiate populations                          |
| Tan: Medical response to the 2009 Sumatra earthquake: Health needs in the post-disaster period                                                                                                | 2012 | No BP measured                                            |
| Tanaka: Predictors of Hypertension in Survivors of the Great East Japan Earthquake, 2011: A Cross-sectional Study                                                                             | 2016 | Cannot differentiate populations                          |
| Tanigawa: MON-336 LONGITUDINAL ANALYSIS OF KIDNEY FUNCTION AND POSSIBLE FACTORS INVOLVED AFTER THE GREAT EAST JAPAN EARTHQUAKE AMONG RESIDENTS NEAR THE FUKUSHIMA DAIICHI NUCLEAR POWER PLANT | 2019 | Wrong article type                                        |
| Tavilla: Blood pressure changes in African males during application for asylum status in Italy: A pilot study                                                                                 | 2018 | Wrong article type                                        |
| Tayfur: Healthcare Service Access and Utilization among Syrian Refugees in Turkey                                                                                                             | 2019 | No BP measured                                            |
| Terayama: Impact of the great East Japan earthquake on stroke incidence among survivors in sanriku coastal area                                                                               | 2013 | Wrong article type                                        |
| Thompson: Effect of hurricane katrina on medication adherence and blood pressure among hypertensive veterans                                                                                  | 2012 | Wrong article type                                        |
| Tiong: Health issues in newly arrived African refugees attending general practice clinics in Melbourne                                                                                        | 2006 | No BP measured                                            |
| Toar: Comparison of self-reported health & healthcare utilisation between asylum seekers and refugees: an observational study                                                                 | 2009 | No BP measured                                            |
| Tomio: Interruption of medication among outpatients with chronic conditions after a flood                                                                                                     | 2010 | Study population selected on the basis of another disease |
| Trovata: Dangerous crossing: demographic and clinical features of rescued sea migrants seen in 2014 at an outpatient clinic at Augusta Harbor, Italy                                          | 2016 | Cannot differentiate populations                          |
| Truppa: Utilization of primary health care services among Syrian refugee and Lebanese women targeted by the ICRC program in Lebanon: a cross-sectional study                                  | 2019 | No BP measured                                            |
| Tsubokura: The immediate physical and mental health crisis in residents proximal to the evacuation zone after Japan's                                                                         | 2014 | Blood pressure measured but no                            |

|                                                                                                                                                                                                                                                                      |      |                                                           |
|----------------------------------------------------------------------------------------------------------------------------------------------------------------------------------------------------------------------------------------------------------------------|------|-----------------------------------------------------------|
| nuclear disaster: an observational pilot study                                                                                                                                                                                                                       |      | diagnosis of hypertension                                 |
| Uscher-Pines: The physical health impacts of post-disaster displacement: A study of the older adult victims of Hurricane Katrina                                                                                                                                     | 2008 | Wrong article type                                        |
| van Berlaer: A refugee camp in the centre of Europe: clinical characteristics of asylum seekers arriving in Brussels                                                                                                                                                 | 2016 | Cannot differentiate populations                          |
| van Melle: Quality of primary care for resettled refugees in the Netherlands with chronic mental and physical health problems: a cross-sectional analysis of medical records and interview data                                                                      | 2014 | Cannot differentiate populations                          |
| Vukovia: Psychological and somatic health problems in Bosnian refugees: a three year follow-up                                                                                                                                                                       | 2014 | Cannot differentiate populations                          |
| Vulic: Post-trauma cardiovascular risk factors and subclinical atherosclerosis in young adults following the war in Bosnia and Herzegovina                                                                                                                           | 2019 | Cannot differentiate populations                          |
| Vulic: Post-trauma cardiovascular risk factors and subclinical atherosclerosis in young adults following war in bosnia-herzegovina                                                                                                                                   | 2012 | Wrong article type                                        |
| Vulic: Post-trauma predictors cardiovascular diseases in young adults following war                                                                                                                                                                                  | 2013 | Wrong article type                                        |
| Wagner: Trauma, healthcare access, and health outcomes among Southeast Asian refugees in Connecticut                                                                                                                                                                 | 2013 | Cannot differentiate populations                          |
| Watts: Determinants of health care access on the U.S.-Mexico border                                                                                                                                                                                                  | 2009 | Wrong article type                                        |
| Wen: Quality of life, physical diseases, and psychological impairment among survivors 3 years after Wenchuan earthquake: a population based survey                                                                                                                   | 2012 | No BP measured                                            |
| Wieland: Diabetes care among Somali immigrants and refugees                                                                                                                                                                                                          | 2012 | Study population selected on the basis of another disease |
| Wiwanitkit: Post-earthquake chronic illness                                                                                                                                                                                                                          | 2013 | Duplicate                                                 |
| Wiwanitkit: Post-earthquake chronic illness...Hung KKC, Lam ECC, Chan EYY, Graham CA. Disease pattern and chronic illness in rural China: the Hong Kong Red Cross basic health clinic after 2008 Sichuan earthquake. <i>Emerg. Med. Australas.</i> 2013; 25: 252-259 | 2013 | Wrong article type                                        |
| Woersching: Post-earthquake chronic illness                                                                                                                                                                                                                          | 2003 | Cannot differentiate populations                          |
| Wu: A cross-sectional survey on the health status and the health-related quality of life of the elderly after flood disaster in Bazhong city, Sichuan, China                                                                                                         | 2015 | No BP measured                                            |
| Yamauchi: Impact of ethnic conflict on the nutritional status and quality of life of suburban villagers in the Solomon Islands                                                                                                                                       | 2010 | Blood pressure measured but no diagnosis of hypertension  |
| Yanni: The health profile and chronic diseases comorbidities of US-bound Iraqi refugees screened by the International Organization for Migration in Jordan: 2007-2009                                                                                                | 2013 | Cannot differentiate populations                          |
| Yoda: Relationship Between Long-term Flooding and Serious Mental Illness After the 2011 Flood in Thailand                                                                                                                                                            | 2017 | Cannot differentiate populations                          |
| Yun: High prevalence of chronic non-communicable conditions                                                                                                                                                                                                          | 2012 | Cannot differentiate                                      |

|                                                                                                                                                                                                               |      |                                  |
|---------------------------------------------------------------------------------------------------------------------------------------------------------------------------------------------------------------|------|----------------------------------|
| among adult refugees: implications for practice and policy                                                                                                                                                    |      | populations                      |
| Yun: Prevalence of chronic disease and insurance coverage among refugees in the United States                                                                                                                 | 2012 | Cannot differentiate populations |
| Yun: Prevalence of chronic disease and insurance coverage among refugees in the United States                                                                                                                 | 2012 | Cannot differentiate populations |
| Zabaneh: Living and health conditions of Palestinian refugees in an unofficial camp in the Lebanon: a cross-sectional survey                                                                                  | 2008 | No BP measured                   |
| Zeynalov: Epidemiological features of the main risk factors for cardiovascular disease among the unorganized man's population of Baku and Sumgait city population of internally displaced persons 20-59 years | 2016 | Population not directly affected |
| Zhihong: The impact of anxiety on blood pressure of flood victims                                                                                                                                             | 2011 | Wrong article type               |
