# Supplementary material for: A systematic review of the burden of hypertension, access to services and patient views of hypertension in humanitarian crisis settings
Source: PubMed Central journal article supplement (PMC7654140; doi:10.1136/bmjgh-2020-002440), 2020-11-09
Supplement: bmjgh-2020-002440supp004.pdf [file bmjgh-2020-002440supp004.pdf]

## Appendix Four:

Articles retrieved from the grey literature searches excluded at the full text stage

| Authors and Title                                                                                                                                    | Year | Reason                                                    |
|------------------------------------------------------------------------------------------------------------------------------------------------------|------|-----------------------------------------------------------|
| A Qualitative Cross-sectional Cluster Survey: Population-Based Health Access Assessment for Syrian Refugees in Non-Camp Settings Throughout Jordan   |      | No BP measured                                            |
| Al-rousan: Health needs and priorities of Syrian refugees in camps and urban settings in Jordan : perspectives of refugees and health care providers | 2018 | Qualitative study talking to general population           |
| Al-sharafi: Endocrinology & Metabolic Syndrome The Effect of War on the Control of Diabetes in Patients with Type 2 Diabetes                         | 2017 | Study population selected on the basis of another disease |
| Amara: Health needs and priorities of Syrian refugees in camps and urban settings in Jordan : perspectives of refugees and health care providers     | 2014 | Wrong article type                                        |
| American Near East Refugee Aid: Palestinian Refugees from Syria in Lebanon                                                                           | 2013 | Cannot differentiate populations                          |
| Anon: HEALTH Chapter                                                                                                                                 |      | Wrong article type                                        |
| Arnaout: Assessment of the health needs of Syrian refugees in Lebanon and Syria's neighboring countries                                              | 2019 | Wrong article type                                        |
| Bhatiasevi: Humanitarian crisis after the Nepal earthquakes 2015                                                                                     | 2015 | No methods                                                |
| Boullé: Cardiovascular Disease among Syrian refugees : a descriptive study of patients in two Médecins Sans Frontières clinics in northern Lebanon   | 2019 | Duplicate                                                 |
| Canada, Citizenship and Immigration: Population Profile : Syrian Refugees                                                                            | 2015 | Cannot differentiate populations                          |
| Chaudhry: CARING FOR SYRIAN REFUGEES : A GUIDE FOR PRIMARY CARE PROVIDERS IN ONTARIO – Niagara Region Edition                                        | 2015 | Wrong article type                                        |
| Danish Refugee Council: Iraqi Population Survey in Lebanon Iraqi Population Survey in Lebanon                                                        | 2007 | Cannot differentiate populations                          |
| Dhital: Dealing with the burden of hypertension in Nepal : current status , challenges and health system issues                                      | 2013 | Population not directly affected                          |
| Dolan: Position Paper - Perspectives on the nutrition response in the Syria crisis                                                                   | 2014 | No methods                                                |
| Doocy: Pilot Testing and Implementation of a mHealth tool for Non-communicable Diseases in a Humanitarian Setting                                    | 2017 | Cannot differentiate populations                          |

|                                                                                                                                                                                                                                                                         |      |                                                 |
|-------------------------------------------------------------------------------------------------------------------------------------------------------------------------------------------------------------------------------------------------------------------------|------|-------------------------------------------------|
| Dookeran: Chronic Disease and Its Risk Factors Among Refugees and Asylees in Massachusetts , 2001-2005                                                                                                                                                                  | 2010 | Duplicate                                       |
| Dudova: Commonest Diseases Amongst Iraqi Internally Displaced After Islamic State Expansion                                                                                                                                                                             | 2015 | Duplicate                                       |
| Farhat: Migrants ' journey , vulnerabilities , access to information and endured violence during the journey and in refugee camps in Ioannina , Attica , Athens and Samos , Greece                                                                                      | 2017 | Cannot differentiate populations                |
| Ford: Chronic Disease in Health Emergencies : In the Eye of the Hurricane                                                                                                                                                                                               | 2006 | Population not directly affected                |
| German Foreign Office: Report External Mid-Term Evaluation of Humanitarian Aid. Refugee aid in Lebanon                                                                                                                                                                  | 2017 | No methods                                      |
| Hashani: Lifestyle predictors of hypertension in the adult population of post-war Kosovo                                                                                                                                                                                | 2013 | Cannot differentiate populations                |
| Health Sector Cox's Bazar: Rohingya Crisis in Cox ' s Bazar District , Bangladesh : Health Sector Bulletin                                                                                                                                                              | 2019 | No methods                                      |
| Healthwatch: Health issues of asylum seekers and refugees in Gateshead and Newcastle 2016                                                                                                                                                                               | 2016 | Qualitative study talking to general population |
| Human Rights Watch: VENEZUELA'S HUMANITARIAN CRISIS. Severe Medical and Food Shortages, Inadequate and Repressive Government Response                                                                                                                                   | 2016 | Qualitative study talking to general population |
| IPSOS: Healthcare Assessment Of Syrian And Iraqi Urban Refugees In Jordan                                                                                                                                                                                               | 2015 | No methods                                      |
| IPSOS: SECOND IPSOS SURVEY ON IRAQI REFUGEES ( November 2007 )                                                                                                                                                                                                          | 2007 | No methods                                      |
| John Snow, INC: Health & status of Palestine refugees from Syria in Jordan                                                                                                                                                                                              |      | Qualitative study talking to general population |
| Kario: Disaster Hypertension – Its Characteristics, Mechanism, and Management –                                                                                                                                                                                         | 2012 | Wrong article type                              |
| Kayali: Treating Syrian refugees with diabetes and hypertension Frontières model of care and treatment outcomes . Treating Syrian refugees with diabetes and hypertension in Shatila refugee camp , Lebanon : Médecins Sans Frontières model of care and treatment outc | 2019 | Duplicate                                       |
| Khader: Cohort monitoring of persons with hypertension : an illustrated example from a primary healthcare clinic for Palestine refugees in Jordan . Cohort monitoring of persons with hypertension : an illustrated example from a primary healthcare clinic for Palest | 2019 | Duplicate                                       |
| Khader: Hypertension and treatment outcomes in Palestine refugees in United Nations Relief and Works Agency primary health care clinics in Jordan                                                                                                                       | 2014 | Duplicate                                       |
| Levine: Counting the cost Assessing the cost of ill-health in West Darfur, Sudan                                                                                                                                                                                        | 2019 | Population not directly affected                |
| Mcnatt: "What's happening in Syria even affects the rocks " : a qualitative study of the Syrian refugee experience accessing                                                                                                                                            | 2019 | Qualitative study talking                       |

|                                                                                                                                                                                                         |      |                                           |
|---------------------------------------------------------------------------------------------------------------------------------------------------------------------------------------------------------|------|-------------------------------------------|
| noncommunicable disease services in Jordan                                                                                                                                                              |      | to general population                     |
| Médecins Sans Frontières: EAST DARAA, SYRIA BASELINE ASSESSMENT                                                                                                                                         | 2016 | Cannot differentiate populations          |
| Médecins Sans Frontières: Haiti one year after                                                                                                                                                          | 2011 | No methods                                |
| Médecins Sans Frontières: Mixed methods evaluation of MSF primary care based NCD service in Irbid , Jordon : February 2017 - February 2018                                                              | 2019 | Cannot differentiate populations          |
| Médecins Sans Frontières: Morbidity, healthcare needs and barriers to access medical care amongst local and displaced populations in west Dar'aa and Quneitra, Southern Syria                           | 2019 | No methods                                |
| Médecins Sans Frontières: PROGRAMME EAST DARAA , SYRIA FIRST FOLLOW-UP ASSESSMENT                                                                                                                       | 2017 | Cannot differentiate populations          |
| Palafox: Wealth and cardiovascular health : a cross-sectional study of wealth-related inequalities in the awareness , treatment and control of hypertension in high- , middle- and low-income countries | 2016 | Cannot differentiate populations          |
| Pavli: Health problems of newly arrived migrants and refugees in Europe                                                                                                                                 | 2017 | Wrong article type                        |
| Porte: Evaluation report : Response to Natural Disaster Transversal evaluation of seven OCG interventions in 2007                                                                                       | 2008 | No methods                                |
| Redditt: Health status of newly arrived refugees in Toronto, Ont                                                                                                                                        | 2015 | Duplicate                                 |
| Rehr: Prevalence of non-communicable diseases and access to care among non-camp Syrian refugees in northern Jordan                                                                                      | 2018 | Duplicate                                 |
| Salazar: Health Consequences of an Armed Conflict in Zamboanga , Philippines Using a Syndromic Surveillance Database                                                                                    | 2018 | Duplicate                                 |
| Sethi: Community-Based Noncommunicable Disease Care for Syrian Refugees in Lebanon Global and Regional Refugee Trends                                                                                   | 2017 | No methods                                |
| State of Queensland (Queensland Health): Iraqi Australians                                                                                                                                              | 2011 | Wrong article type                        |
| Su: Refugee Health Needs Assessment in Omaha, Nebraska                                                                                                                                                  | 2017 | Cannot differentiate populations          |
| U.S. Department of Health and Human Services: BHUTANESE REFUGEE HEALTH PROFILE                                                                                                                          | 2014 | No methods                                |
| U.S. Department of Health and Human Services: SYRIAN REFUGEE HEALTH PROFILE                                                                                                                             | 2016 | No methods                                |
| United Nations High Commissioner for Refugees: At a glance Health access and utilization survey among non-camp refugees in Jordan                                                                       | 2015 | Cannot differentiate populations          |
| United Nations High Commissioner for Refugees: At a glance Health access and utilization survey among Syrian refugees in Lebanon                                                                        | 2016 | Cannot differentiate populations          |
| United Nations High Commissioner for Refugees: Directives opérationnelles pour l ' amélioration de la santé des nouveau-nés lors des opérations de secours aux réfugiés Table des matières              | 2013 | Study population selected on the basis of |

|                                                                                                                                                                    |      |                                  |
|--------------------------------------------------------------------------------------------------------------------------------------------------------------------|------|----------------------------------|
|                                                                                                                                                                    |      | another disease                  |
| United Nations High Commissioner for Refugees: Forcibly Displaced Myanmar Nationals (FDMNs) in Cox's Bazar , Bangladesh: Health Sector Bulletin                    | 2017 | No methods                       |
| United Nations High Commissioner for Refugees: HEALTH ACCESS AND UTILIZATION SURVEY - ACCESS TO HEALTH SERVICES IN JORDAN AMONG SYRIAN REFUGEES                    | 2016 | Cannot differentiate populations |
| United Nations High Commissioner for Refugees: Health access and utilization survey among Syrian refugees in Lebanon                                               | 2017 | Cannot differentiate populations |
| United Nations High Commissioner for Refugees: Health access and utilization survey among Syrian refugees in Lebanon                                               | 2018 | Cannot differentiate populations |
| United Nations High Commissioner for Refugees: Health access and utilization survey. Access to Healthcare Services Among Syrian Refugees in Jordan                 | 2018 | Cannot differentiate populations |
| United Nations High Commissioner for Refugees: Health and Nutrition Quarterly                                                                                      | 2014 | No methods                       |
| United Nations High Commissioner for Refugees: HEALTH CARE IN BOSNIA AND HERZEGOVINA IN THE CONTEXT OF THE RETURN OF REFUGEES AND DISPLACED PERSONS                | 2001 | Wrong article type               |
| United Nations High Commissioner for Refugees: Iraq. Multi-Sector Needs Assessment (MSNA) IV of Refugees Living out of Formal Camps in the KR-I                    | 2019 | Cannot differentiate populations |
| United Nations High Commissioner for Refugees: Joint Assessment for Syrian Refugees in Egypt                                                                       | 2013 | Cannot differentiate populations |
| United Nations High Commissioner for Refugees: Multi-Sector Needs Assessment III (MSNA III) Syrian Refugees in Host Communities of Kurdistan Region of Iraq (KR-I) | 2017 | Cannot differentiate populations |
| United Nations High Commissioner for Refugees: MULTI-SECTOR NEEDS ASSESSMENT OF SYRIAN REFUGEES RESIDING IN CAMPS                                                  | 2015 | Cannot differentiate populations |
| United Nations High Commissioner for Refugees: Operational Update - Jordan August 2018                                                                             | 2018 | No methods                       |
| United Nations High Commissioner for Refugees: RESTORING DIGNITY : RESPONSES TO THE CRITICAL NEEDS OF VULNERABLE PALESTINE REFUGEES                                | 2011 | No methods                       |
| United Nations High Commissioner for Refugees: Rohingya Crisis in Cox's Bazar District, Bangladesh: Health Sector Bulletin                                         | 2019 | No methods                       |
| United Nations High Commissioner for Refugees: The Annual Report of the Department of Health 2011                                                                  | 2012 | No methods                       |
| United Nations High Commissioner for Refugees: THE DEMOCRATIC REPUBLIC OF CONGO SITUATION                                                                          | 2018 | No methods                       |
| United Nations Relief and Works Agency: lebanon field office                                                                                                       | 2013 | No methods                       |
| United Nations Relief and Works Agency: UNRWA health department annual report 2012                                                                                 | 2013 | No methods                       |
| United Nations Relief and Works Agency: UNRWA health department annual report 2017                                                                                 | 2017 | No methods                       |
| World Health Organization: Health conditions of , and assistance to , the Arab population in the occupied Arab territories , including                             | 2001 | No methods                       |

|                                                                                                                                                                                        |      |                                  |
|----------------------------------------------------------------------------------------------------------------------------------------------------------------------------------------|------|----------------------------------|
| Palestine                                                                                                                                                                              |      |                                  |
| World Health Organization: Health of refugees and migrants. Regional situation analysis, practices, experiences, lessons learned and ways forward - Africa                             | 2018 | Wrong article type               |
| World Health Organization: Health of refugees and migrants. Regional situation analysis, practices, experiences, lessons learned and ways forward -Europe                              | 2018 | Wrong article type               |
| World Health Organization: Syrian Arab Republic , Jordan , Lebanon , Iraq                                                                                                              | 2013 | No methods                       |
| World Health Organization:Health of refugees and migrants. Practices in addressing the health needs of refugees and migrants                                                           | 2018 | No methods                       |
| World Vision Lebanon: Assessment of reduction of water provision in informal tented settlements and its association with the livelihood status of Syrian refugees in the Bekaa Valley. | 2018 | Cannot differentiate populations |
| تيفخلا برحلا تفلكت                                                                                                                                                                     |      | Wrong article type               |
