# Supplementary material for: A systematic review of the burden of hypertension, access to services and patient views of hypertension in humanitarian crisis settings
Source: PubMed Central journal article supplement (PMC7654140; doi:10.1136/bmjgh-2020-002440), 2020-11-09
Supplement: bmjgh-2020-002440supp005.pdf [file bmjgh-2020-002440supp005.pdf]

## Appendix 5

Table showing risk of bias across all domains for included studies.

| Author, year            | External validity |         |     | Internal validity |     |         |     |         |     | Overall external validity ROB | Overall internal validity ROB | Overall ROB |
|-------------------------|-------------------|---------|-----|-------------------|-----|---------|-----|---------|-----|-------------------------------|-------------------------------|-------------|
|                         | A                 | B       | C   | D                 | E   | F       | G   | H       | I   |                               |                               |             |
| Abukhdeir 2013(77)      | Yes               | Unclear | Yes | No                | Yes | NA      | Yes | Yes     | No  | Low                           | High                          | High        |
| Adrega 2018(71)         | No                | No      | NA  | Yes               | No  | No      | Yes | Unclear | Yes | High                          | High                          | High        |
| An 2015(50)             | No                | No      | NA  | Yes               | No  | No      | Yes | Yes     | Yes | High                          | High                          | High        |
| Anon. 2010(109)         | Yes               | Yes     | No  | Yes               | Yes | Unclear | NA  | No      | Yes | High                          | High                          | High        |
| Balcilar 2016(79)       | Yes               | Yes     | Yes | Yes               | Yes | Yes     | Yes | Yes     | Yes | Low                           | Low                           | Low         |
| Burger 2019(61)         | No                | No      | NA  | Yes               | No  | No      | Yes | Unclear | Yes | High                          | High                          | High        |
| Burton 2009(60)         | No                | NA      | NA  | No                | Yes | No      | Yes | Yes     | Yes | High                          | Low                           | High        |
| Cetorelli 2017(68)      | Yes               | Yes     | Yes | No                | Yes | No      | Yes | Yes     | Yes | Low                           | High                          | High        |
| Chahda 2015(80)         | No                | Yes     | Yes | Yes               | No  | No      | Yes | Unclear | Yes | High                          | High                          | High        |
| Doocy 2013(63)          | No                | Yes     | Yes | No                | No  | No      | Yes | Unclear | Yes | High                          | High                          | High        |
| Doocy 2015(82)          | Yes               | Yes     | Yes | No                | No  | No      | Yes | Yes     | Yes | Low                           | High                          | High        |
| Doocy 2016 Jordan(89)   | Yes               | Yes     | Yes | No                | Yes | No      | Yes | Yes     | No  | Low                           | High                          | High        |
| Doocy 2016 Lebanon(83)  | No                | Yes     | Yes | No                | Yes | No      | Yes | Yes     | No  | High                          | High                          | High        |
| Doocy 2018(81)          | No                | No      | No  | Yes               | No  | Unclear | Yes | Yes     | Yes | High                          | High                          | High        |
| Dudova 2015(69)         | No                | Yes     | NA  | No                | No  | No      | Yes | Unclear | Yes | High                          | High                          | High        |
| Ebner 2016(38)          | No                | Yes     | NA  | No                | No  | No      | Yes | No      | Yes | High                          | High                          | High        |
| Eryurt 2019(84)         | Yes               | Yes     | NA  | Yes               | Yes | Yes     | Yes | No      | No  | High                          | High                          | High        |
| Furusawa 2011(36)       | Yes               | Yes     | NA  | Yes               | No  | No      | Yes | No      | No  | High                          | High                          | High        |
| Gomez 2009(51)          | No                | Yes     | NA  | No                | No  | No      | NA  | Unclear | No  | High                          | High                          | High        |
| Gomez-Restrepo 2015(35) | Unclear           | No      | NA  | Yes               | Yes | No      | Yes | Unclear | Yes | High                          | High                          | High        |
| Greenough 2008(52)      | Yes               | Yes     | Yes | Yes               | No  | No      | Yes | Yes     | Yes | Low                           | High                          | High        |

|                                                             |     |     |     |     |     |         |     |         |     |      |      |      |
|-------------------------------------------------------------|-----|-----|-----|-----|-----|---------|-----|---------|-----|------|------|------|
| <b>Hayashi 2017</b> (39)                                    | No  | Yes | NA  | No  | No  | No      | Yes | No      | Yes | High | High | High |
| <b>Hoshide 2019</b> (40)                                    | No  | No  | NA  | Yes | Yes | Yes     | Yes | Yes     | Yes | High | Low  | High |
| <b>Hurricane Katrina Community Advisory Group 2007</b> (53) | Yes | Yes | No  | Yes | No  | No      | Yes | Unclear | No  | High | High | High |
| <b>Islam 2008</b> (54)                                      | No  | NA  | No  | Yes | Yes | Yes     | Yes | Yes     | Yes | High | Low  | High |
| <b>Jen 2015</b> (31)                                        | No  | Yes | Yes | Yes | Yes | No      | Yes | Yes     | Yes | High | Low  | High |
| <b>Kayali 2019</b> (90)                                     | No  | Yes | NA  | No  | Yes | No      | Yes | NA      | Yes | High | High | High |
| <b>Khader 2012</b> (73)                                     | No  | Yes | NA  | No  | Yes | No      | Yes | NA      | Yes | High | High | High |
| <b>Khader 2014</b> (72)                                     | No  | Yes | NA  | No  | Yes | No      | Yes | NA      | Yes | High | High | High |
| <b>Krol 2007</b> (55)                                       | No  | Yes | NA  | No  | No  | No      | Yes | Unclear | Yes | High | High | High |
| <b>Krousel-Wood, 2008</b> (56)                              | No  | No  | NA  | Yes | Yes | Yes     | Yes | NA      | Yes | High | Low  | High |
| <b>Lafta 2016</b> (65)                                      | No  | Yes | Yes | Yes | No  | No      | Yes | Yes     | Yes | High | High | High |
| <b>Lin 2015</b> (91)                                        | No  | No  | NA  | Yes | No  | No      | Yes | Unclear | Yes | High | High | High |
| <b>Lipsitz 2010</b> (70)                                    | No  | Yes | NA  | No  | No  | No      | Yes | Yes     | No  | High | High | High |
| <b>Maldari 2019</b> (34)                                    | No  | No  | Yes | Yes | No  | No      | Yes | Unclear | No  | High | High | High |
| <b>Mateen 2012</b> (64)                                     | No  | No  | NA  | No  | Yes | No      | NA  | Unclear | Yes | High | High | High |
| <b>Mobula 2016</b> (78)                                     | No  | Yes | NA  | No  | No  | No      | yes | yes     | No  | High | High | High |
| <b>Mousa 2010</b> (74)                                      | No  | Yes | NA  | Yes | No  | No      | Yes | No      | Yes | High | High | High |
| <b>Nagai 2018</b> (41)                                      | No  | Yes | NA  | No  | No  | No      | Yes | No      | Yes | High | High | High |
| <b>Nomura 2016</b> (42)                                     | No  | Yes | NA  | No  | No  | No      | Yes | No      | Yes | High | High | High |
| <b>Ohira 2016</b> (43)                                      | No  | Yes | NA  | No  | Yes | Yes     | Yes | Yes     | Yes | High | Low  | High |
| <b>Prueksaritanond 2007</b> (62)                            | No  | No  | NA  | Yes | No  | No      | NA  | Unclear | Yes | High | High | High |
| <b>Rehr 2018</b> (85)                                       | Yes | Yes | Yes | No  | No  | No      | Yes | Yes     | Yes | Low  | High | High |
| <b>Renzaho 2014</b> (33)                                    | No  | No  | NA  | Yes | Yes | No      | Yes | Yes     | Yes | High | Low  | High |
| <b>Rodriguez 2006</b> (57)                                  | No  | No  | NA  | Yes | No  | No      | Yes | Unclear | No  | High | High | High |
| <b>Saadeh 2015</b> (75)                                     | No  | yes | NA  | No  | No  | No      | Yes | Yes     | Yes | High | High | High |
| <b>Sakai 2017</b> (44)                                      | No  | Yes | NA  | No  | No  | No      | Yes | Yes     | No  | High | High | High |
| <b>Saleh 2018</b> (76)                                      | No  | Yes | Yes | Yes | No  | No      | Yes | No      | Yes | High | High | High |
| <b>Satoh 2016</b> (45)                                      | No  | Yes | NA  | Yes | Yes | No      | Yes | Yes     | No  | High | High | High |
| <b>Shiba 2019</b> (46)                                      | Yes | No  | No  | Yes | Yes | No      | Yes | Yes     | Yes | High | High | High |
| <b>Suda 2019</b> (47)                                       | No  | Yes | NA  | No  | Yes | Unclear | Yes | Unclear | No  | High | High | High |
| <b>Sun 2013</b> (92)                                        | Yes | Yes | NA  | Yes | No  | No      | Yes | Yes     | Yes | High | High | High |
| <b>Takahashi 2016</b> (48)                                  | No  | Yes | NA  | Yes | No  | No      | Yes | Unclear | Yes | High | High | High |

|                         |     |     |     |         |     |     |     |         |     |      |      |      |
|-------------------------|-----|-----|-----|---------|-----|-----|-----|---------|-----|------|------|------|
|                         |     |     |     |         |     |     |     | lear    |     |      |      |      |
| <b>Taylor 2014(32)</b>  | No  | Yes | No  | Yes     | No  | No  | Yes | Unclear | No  | High | High | High |
| <b>Toda 2017(49)</b>    | No  | Yes | NA  | Yes     | Yes | Yes | Yes | Yes     | Yes | High | Low  | High |
| <b>UNHCR 2014(87)</b>   | Yes | No  | Yes | Unclear | No  | No  | Yes | Unclear | Yes | High | High | High |
| <b>Vanasse 2016(37)</b> | Yes | Yes | NA  | No      | No  | No  | Yes | Yes     | Yes | Low  | High | High |
| <b>Vernier 2019(88)</b> | Yes | Yes | Yes | No      | No  | No  | Yes | Yes     | Yes | Low  | High | High |
| <b>Vest 2006(58)</b>    | No  | Yes | No  | Yes     | No  | No  | Yes | Unclear | Yes | High | High | High |

A= Was the sampling frame a true or close representation of the target population?

B= Was some form of random selection used to select the sample, or was a census undertaken?

C= Was the likelihood of non-response bias minimal?

D= Were data collected directly from the subjects (as opposed to a proxy)?

E= Was an acceptable case definition used?

F= Was the study instrument that measured the parameter of interest shown to have reliability and validity?

G= Was the same mode of data collection used for all subjects?

H= Was the length of the shortest prevalence period for the parameter of interest appropriate?

I= Were the numerator and denominator for the parameter of interest appropriate?
